# Supplementary material for: Genetic dissection of cyclic pyranopterin monophosphate biosynthesis in plant mitochondria
Source: PubMed Central journal article supplement (PMC5791162; doi:10.1042/bcj20170559), 2018-01-31
Supplement: BCJ-475-495-s1.pdf [file BCJ-475-495-s1.pdf]

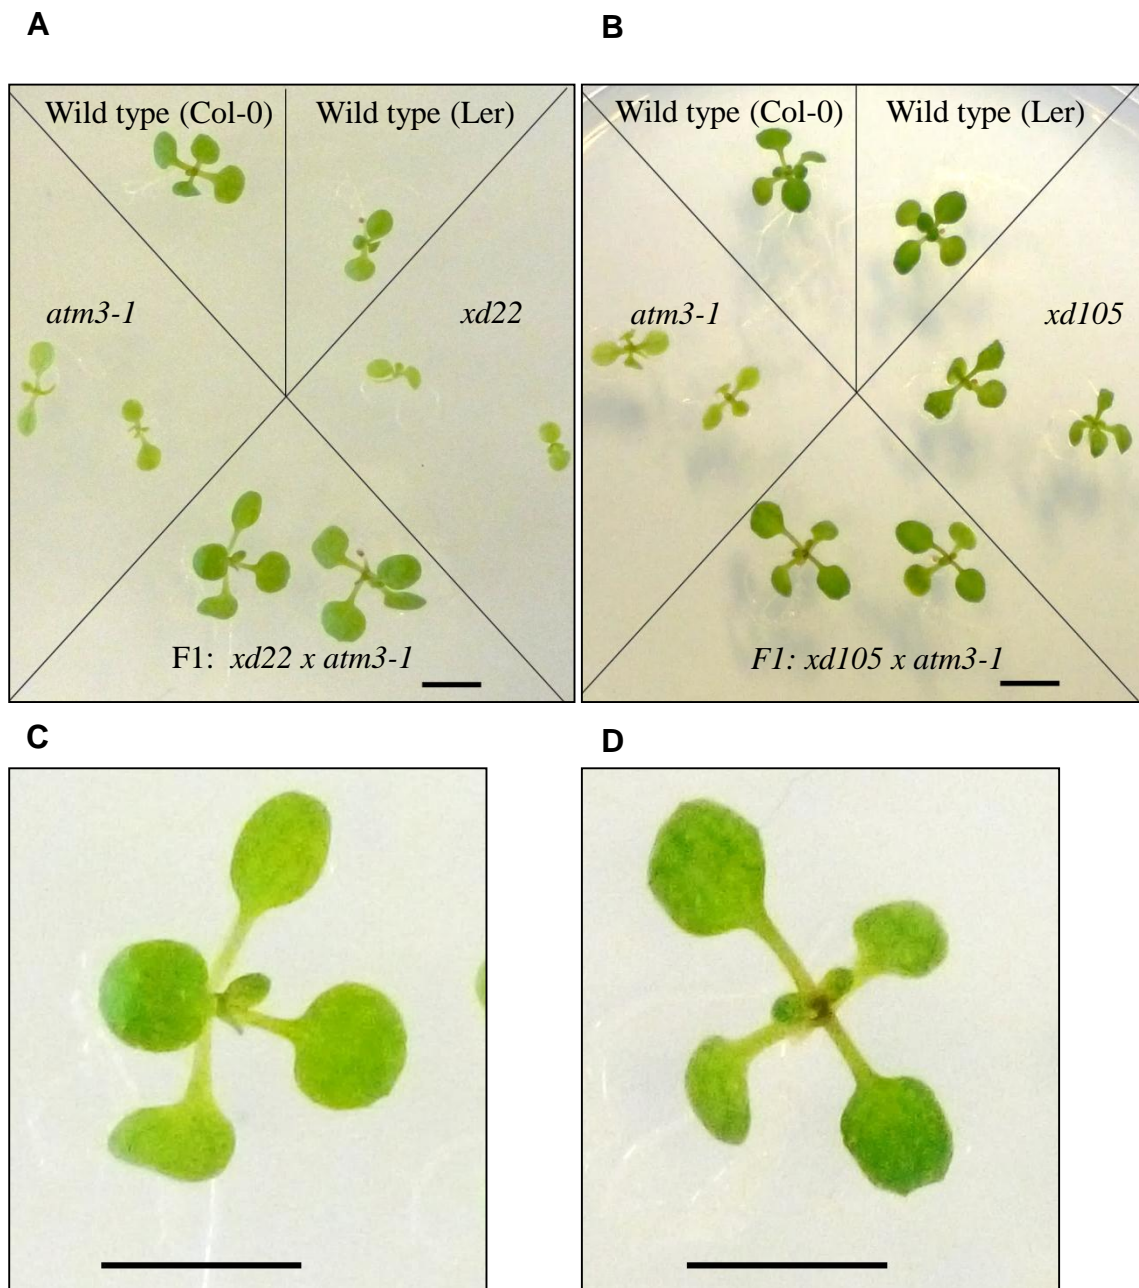

**Supplementary Figure S1.** Growth of parental and F1 plants from *xd22 x atm3-1* and *xd105 x atm3-1* crosses. Plants were grown for 11 days (A) or 15 days (B) on  $\frac{1}{2}$  MS-agar plates. *atm3-1* and *atm3-4* are in the Col-0 background, *xd22* and *xd105* are in the Ler background. Close-up of an F1 plant from *xd22 x atm3-1* (C) and *xd105 x atm3-1* (D). Scale bar is 0.5 cm.

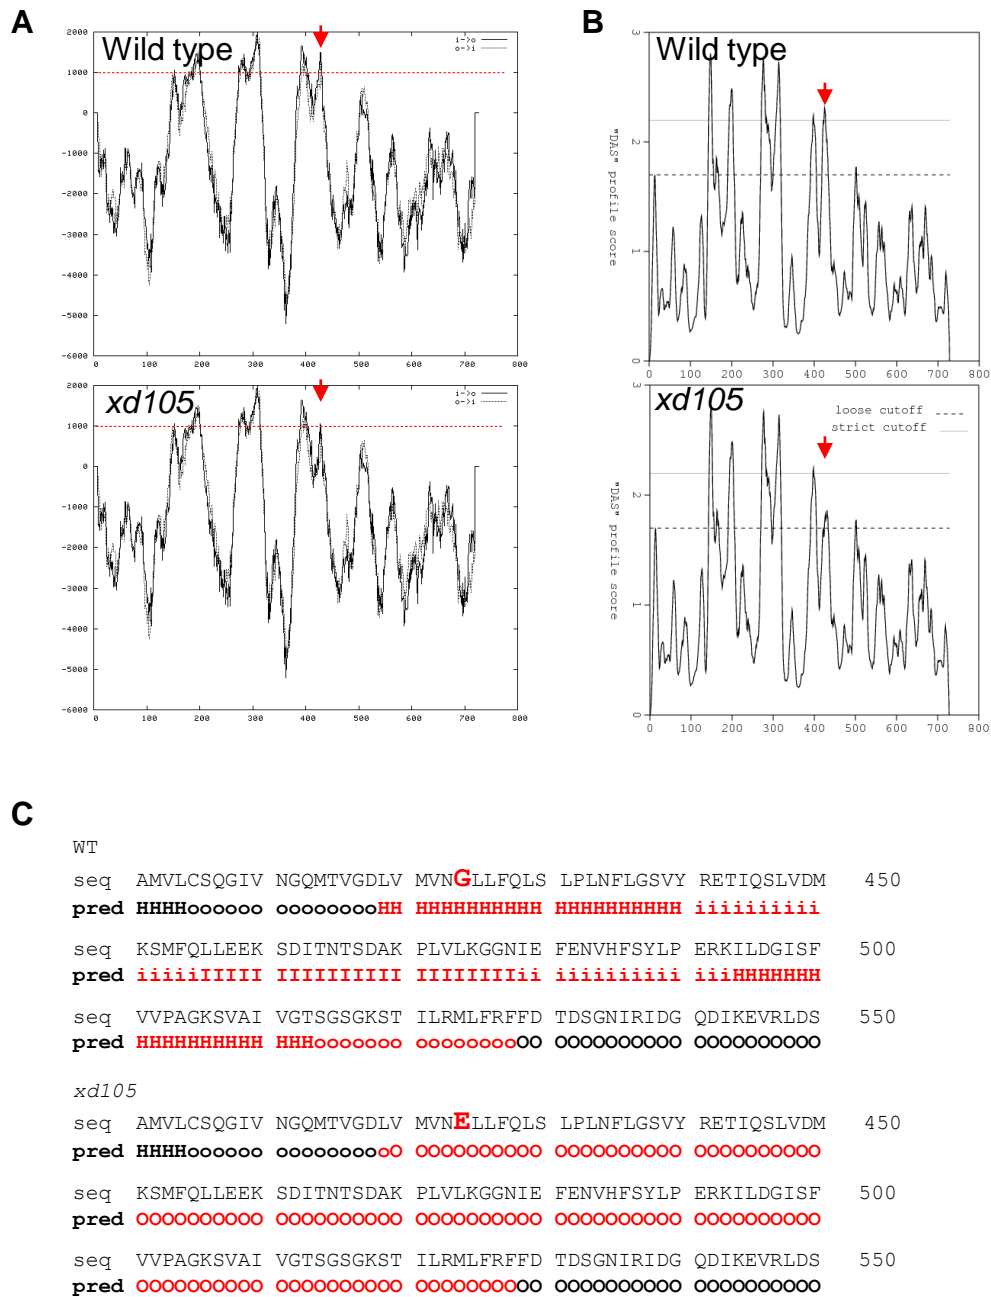

### Supplementary Figure S2. Modelling of structural changes caused by Glycine 424 into Glutamate (G424>E) in ATM3

A. Secondary structure prediction using TMPred ([www.ch.embnet.org/cgi-bin/TMPRED\\_form\\_parser](http://www.ch.embnet.org/cgi-bin/TMPRED_form_parser)). The red arrow indicates the 6<sup>th</sup> transmembrane helix.

B. Secondary structure prediction using DAS ([www.sbc.su.se/~miklos/DAS/tmdas.cgi](http://www.sbc.su.se/~miklos/DAS/tmdas.cgi)). The red arrow indicates the 6<sup>th</sup> transmembrane helix.

Reference: Cserző M, Wallin E, Simon I, von Heijne G, Elofsson A (1997). Prediction of transmembrane  $\alpha$ -helices in prokaryotic membrane proteins: the dense alignment surface method. *Protein Engineering* 10, 673-676.

C. Secondary structure prediction using HMMTOP ([www.enzim.hu/hmmtop/server/hmmtop.cgi](http://www.enzim.hu/hmmtop/server/hmmtop.cgi)).

Reference: Tuszny GE, and Simon I (2001) The HMMTOP transmembrane topology prediction server. *Bioinformatics* 17, 849-850.

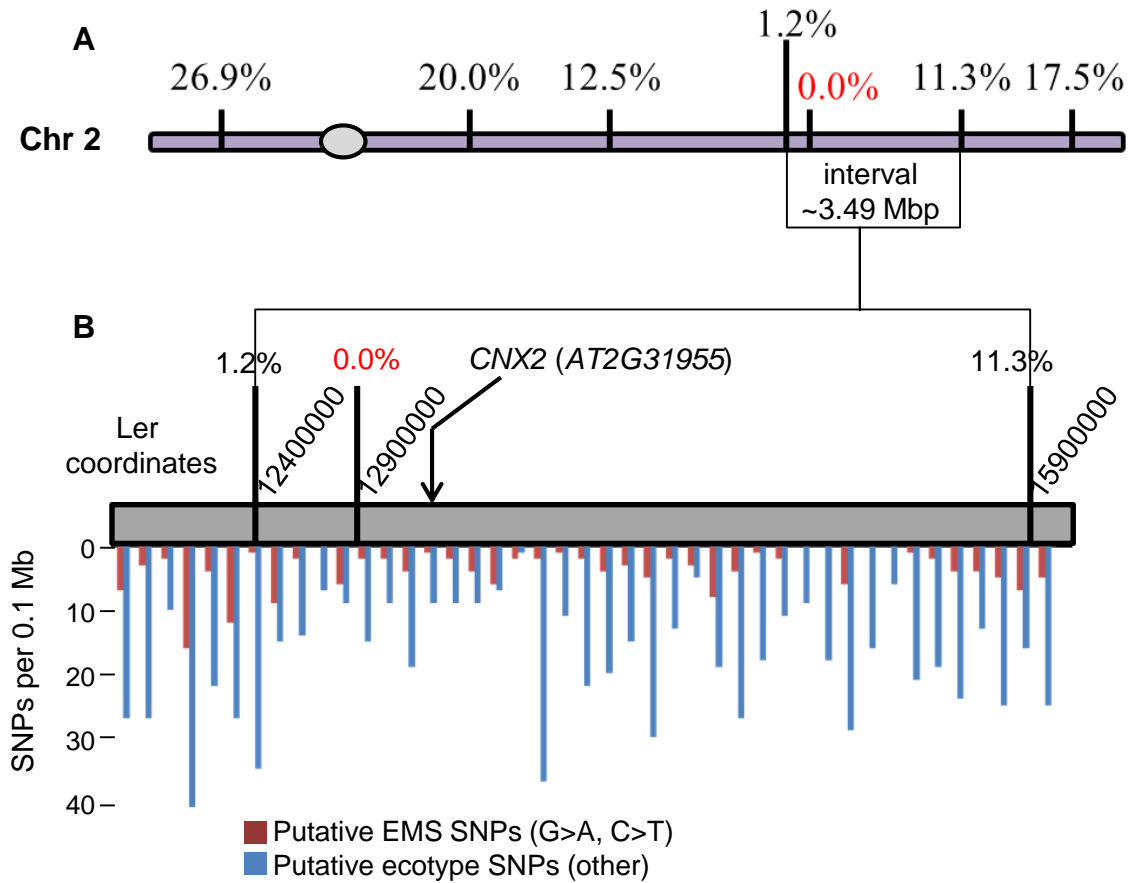

**Supplementary Figure S3. Mapping-by-sequencing of the *xd22* mutation.**

A. Diagram of chromosome 2 with the centromere (grey oval) and percentage recombination at specific SSPL markers. The percentages were calculated based on the analysis of 80 F2 plants from the *xd22* (Ler) x Col-0 with the *xd22* phenotype.

B. Frequency of SNPs in the mapping interval indicated in (A).

**A**

| phenotype \ line   | n   | Wild-type like [%] | Mutant-like [%] | Ungerminated [%] |
|--------------------|-----|--------------------|-----------------|------------------|
| Wild type          | 271 | 99.6               | --              | 0.4              |
| <i>cnx2-1/CNX2</i> | 461 | 79.1               | 20.9            | 0.0              |

**B**

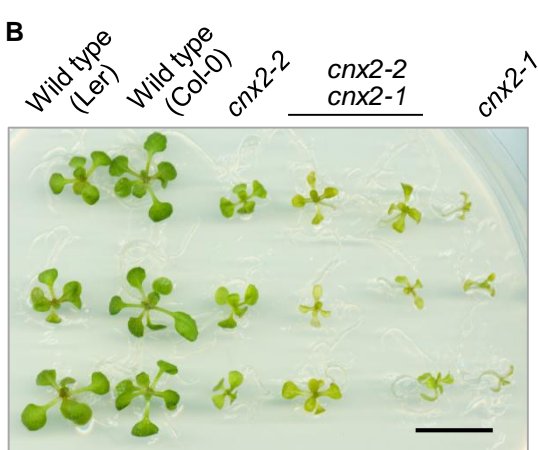

**C**

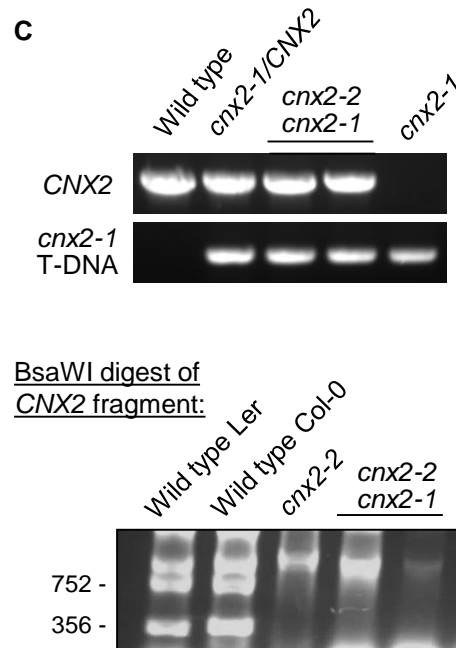

**Supplementary Figure S4. Genetic analysis of the *cnx2-1* line.**

A. Segregation frequency of wild-type and mutant phenotypes from a heterozygous *cnx2-1/CNX2* plant.

B. Allelism between *cnx2-2* and *cnx2-1*. Homozygous *cnx2-2* plants were cross-fertilised with heterozygous *cnx2-1/CNX2* plants and heterozygous *cnx2-2 cnx2-1* seedlings isolated from the F1 generation, and grown alongside *cnx2-1* and wild type parentals (Ler for *cnx2-2*, Col-0 for *cnx2-1*) on ½ MS plus 1% (w/v) sucrose. Scale bar is 1 cm.

C. PCR analysis and restriction digests to confirm the genotype of the seedlings shown in (B). The PCR product for *CNX2* is present in wild type and the *cnx2-2* allele (top panel), but the *cnx2-2* allele lacks a *BsaWI* restriction site (bottom panel), see Figure 4A for details.

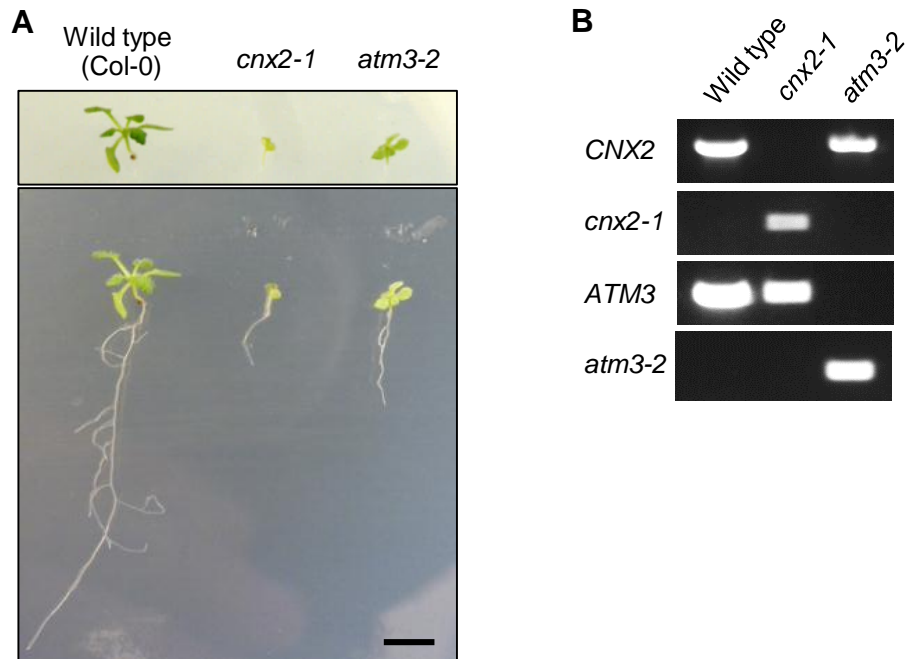

**Supplementary Figure S5. Comparison of seedling growth in *cnx2* and *atm3* knockout mutants.**

A. Growth of *cnx2-1* and *atm3-2* seedlings, knock-out mutants in *CNX2* and *ATM3*, respectively, on agar plates containing ½MS salts and 1% (w/v) sucrose for 3 weeks. Scale bar is 5 mm.

B. Genotype analysis of plants in (A). Primer pairs CNX2 2F and CNX2 2R were used to amplify the wild-type allele of *CNX2*; primers CNX2 2F and LBb1.3 were used to detect the T-DNA insertion in *CNX2* (*cnx2-1*). For the *ATM3* wild-type allele, primers ATM3 F1 and RWT were used, and primers ATM3 F1 and GK8409 for the T-DNA insertion in *ATM3* (*atm3-2*).

**Table S1** List of oligonucleotides

| Oligonucleotide | 5'-3' sequence                         | Use                      |
|-----------------|----------------------------------------|--------------------------|
| ACT2 F2         | CCCAAAGGCCAACAGAGAGA                   | RT-PCR <i>ACTIN2</i>     |
| ACT2 R2         | ACCATCACCAGAATCCAGCA                   | RT-PCR <i>ACTIN2</i>     |
| ATM3 RT-F1      | TTGAGTGGTGGAGAGAAACAAA                 | RT-PCR <i>ATM3</i>       |
| ATM3 RT-R1      | TCCCGTTTTCCAGTACTACGAT                 | RT-PCR <i>ATM3</i>       |
| CNX2 3F         | GGGTGATCTTGCATTCGTTT                   | RT-PCR <i>CNX2</i>       |
| CNX2 3R         | CCGTCTGAAGGTGTGGAAC                    | RT-PCR <i>CNX2</i>       |
| CNX2 2F         | CTCAAGTTGGTTGCTTTTTTCG                 | Genotyping <i>cnx2-1</i> |
| CNX2 2R         | TTTGAAGTTCCCATCTGCAAG                  | Genotyping <i>cnx2-1</i> |
| LBb1.3          | ATTTTGCCGATTTCCGGAAC                   | Genotyping <i>cnx2-1</i> |
| CNX2endog 1F    | AGAAACTAGATTTGCATACCTGGT               | Genotyping <i>cnx2-2</i> |
| CNX2endog 1R    | CGATTTCATAACCCTATCATGCCCTT             | Genotyping <i>cnx2-2</i> |
| CNX2trans F     | CGGTCTGGTGTGATGATGA                    | Transgene <i>CNX2</i>    |
| CNX2trans R     | TAAAGTGCCCCTGATGATGAGATTTTCTTAAA       | Transgene <i>CNX2</i>    |
| ATM3 F1         | GATGTCGAGAGGATCTCGATTCCG               | Genotyping <i>atm3-2</i> |
| ATM3 RWT        | GAAAACTAGAGCTATTGAGAGTTACCA            | Genotyping <i>atm3-2</i> |
| GK8409          | ATATTGACCATCATACTCATTGC                | Genotyping <i>atm3-2</i> |
| A1F             | CTGGCGCGCCAAGCTTTTTATTTCTACTAAGTAA     | Cloning of <i>CNX2</i>   |
| A1R             | TCATCCTTGTAATCGACATTATATTGTTATGAATAAGC | Cloning of <i>CNX2</i>   |
| At1g07810 F     | GTTACACGGACAAAGAGCCTGAAAT              | Mapping                  |
| At1g07810 R     | AAGCAGTCAATATTGCAGGAAGGG               | Mapping                  |
| At1g49610 F     | ACATTTTCTCAATCCTTACTC                  | Mapping                  |
| At1g49610 R     | GAGAGCTTCTTTATTTGTGAT                  | Mapping                  |
| At1g72650 F     | TGTTTTTTAGGACAAATGGCG                  | Mapping                  |
| At1g72650 R     | CTCCAGTTGGAAGCTAAAGGG                  | Mapping                  |
| At1g09940 F     | TCATGACGTGAAGAAGAAGAAAA                | Mapping                  |
| At1g09940 R     | CATATCGCTGCTACTAATTTTAAACAA            | Mapping                  |
| At2g04066 F     | GGGATAATGGATAGGACTCACG                 | Mapping                  |
| At2g04066 R     | GCTGAGAAGGCAAGGAAGAG                   | Mapping                  |
| At2g14890 F     | GAAACTCAATGAAATCCACTT                  | Mapping                  |
| At2g14890 R     | TGAACTTGTTGTGAGCTTTGA                  | Mapping                  |
| At2g39010 F     | TCGTCTACTGCACTGCCG                     | Mapping                  |
| At2g39010 R     | GAGGACATGTATAGGAGCCTCG                 | Mapping                  |
| AT2G21420 F     | GATGCCTTTCTCCTGGTTG                    | Mapping                  |
| AT2G21420 R     | AATATAGCCGTCGTCTTCATCA                 | Mapping                  |
| AT2G31070 F     | AAAGAGATGAGAATTTGGAC                   | Mapping                  |
| AT2G31070 R     | CATATCAATATATTAAGTAGC                  | Mapping                  |
| AT2G44798 F     | TGTTCTTCACTTTGCAAACCA                  | Mapping                  |
| AT2G44798 R     | GTGGCAAATGGGCTAAACTA                   | Mapping                  |
| AT2G29995 F     | CTGCATATTGTTAATGAGAAAAGAAT             | Mapping                  |
| AT2G29995 R     | TCATGTCGAAAACATATAATTGAGC              | Mapping                  |
| At3g11220 F     | GGATTAGATGGGGATTTCTGG                  | Mapping                  |
| At3g11220 R     | TTGCTCGTATCAACACACAGg                  | Mapping                  |
| At3g26605 F     | CCCCGAGTTGAGGTATT                      | Mapping                  |

|             |                              |         |
|-------------|------------------------------|---------|
| At3g26605 R | GAAGAAATTCCTAAAGCATTG        | Mapping |
| At3g50820 F | GTTTCATTAACCTTGCGTGTGT       | Mapping |
| At3g50820 R | TACGGTCAGATTGAGTGATTG        | Mapping |
| At4g01710 F | AGATTTACGTGGAAGCAAT          | Mapping |
| At4g01710 R | GGTTAAAAATTAGGGTTACGA        | Mapping |
| At4g10360 F | GCCAAACCCAAAATTGTAAAAC       | Mapping |
| At4g10360 R | TAGAGGGAACAATCGGATGC         | Mapping |
| At4g29860 F | GCCCAGAGGAAGAAGAGCAAAGTAGC   | Mapping |
| At4g29860 R | TGGGAATTCATGAGAGAATATGTGGGAC | Mapping |
| At5g22545 F | TAGTGAAACCTTTCTCAGAT         | Mapping |
| At5g22545 R | TTATGTTTTCTTCAATCAGTT        | Mapping |
| AT5G42600 F | CAGACGTATCAAATGACAAATG       | Mapping |
| At5g42600 R | GACTACTGCTCAAATATTCTCGG      | Mapping |
| At5g63640 F | ATCACTGTTGTTTACCATTA         | Mapping |
| At5g63640 R | GAGCATTTACAGAGACG            | Mapping |
